Renal pathologic findings and clinical associations in patients with infective endocarditis

N. Povalyaev<sup>1</sup>, A. Pisaryuk<sup>2</sup>, M. Sorokina<sup>3</sup>, M. Teterina<sup>2</sup>, A. Balatskiy<sup>1</sup>, S. Belomytsev<sup>2</sup>, E. Kotova<sup>4</sup>, Y. Karaulova<sup>4</sup>, M. Efremovtseva<sup>4</sup>, P. Malkov<sup>1</sup>, A. Milto<sup>4</sup>, S. Ratchina<sup>4</sup>, Z. Kobalava<sup>4</sup>

<sup>1</sup>M.V. Lomonosov Moscow State University, Moscow, Russian Federation; <sup>2</sup>City Clinical Hospital named after V.V. Vinogradov, Moscow, Russian Federation; <sup>3</sup>Dmitry Rogachev National Research Center of Pediatric Hematology, Oncology and Immunology, Moscow, Russian Federation; <sup>4</sup>Peoples Friendship University of Russia (PFUR), Moscow, Russian Federation

**Background:** Kidney involvement in infective endocarditis (IE) has a huge contribution in failure of the antimicrobial therapy and in rejection of the surgical treatment. Frequency of kidney lesions is still high and is diagnosed in 50–80% cases intravitaly, and in 91,6% post-mortem.

**Materials/Methods:** 28 patients with verified IE (DUKE 2009, 2015), hospitalized and treated in clinical hospital from 2010 to 2018, were included in the study. Kidney function was assessed using CKD-EPI formula. Acute kidney injury (AKI) was diagnosed according to current guidelines (KDIGO 2012). Intravital nephrobiopsy was performed in 2 (7,1%) patients, in 26 patients (92,9%) morphological assessment was made on the autopsy tissue specimens. Autopsy material was assessed grossly and microscopically with H&E staining. Morphological changes in kidney were estimated based on standart histological criteria.

**Results:** Majority of patients with IE (92.9%) had structural changes in kidney tissue: 3 (12%), 16 (64%) and 6 (24%) patients had respectively iso-

lated glomerular, tubular and mixed lesions. Significantly higher is rate of tubular lesion than glomerular ( $p=0.014$ ). Main pattern in glomerular damage was mesangial proliferation, we didn't found any cases of crescentic GN. Herewith, proliferation was mainly diffuse (87.5%) rather than focal (12.5%). Glomerular damage in subacute IE ( $>56$  days) appears more often than in acute IE ( $<56$  days) ( $p=0.057$   $\chi^2=3.63$ ). When studying the influence of various factors on the involvement of the glomeruli or tubules, no statistically significant group differences were obtained, except for the gram-negative flora as the causative agent, in which the tubules are significantly more likely to be affected ( $p=0.019$ )

**Conclusions:** A morphological study of patients with IE revealed a wide range of kidney damage, however, the frequency of tubular lesions, mediated by nephrotoxic drugs and hemodynamic disorders significantly exceeds the frequency of immune complex glomerular lesions, as previously thought.

| Morphological diagnosis                     | n (%)     | Morphological diagnosis                | n (%)    |
|---------------------------------------------|-----------|----------------------------------------|----------|
| Glomerulonephritis                          | 8 (28.6)  | Tubulointerstitial nephritis           | 3 (10.7) |
| Membranoproliferative glomerulonephritis    | 3 (10.7)  | Allergic tubulointerstitial nephritis  | 2 (7.2)  |
| Mesangioproliferative glomerulonephritis    | 5 (17.9)  | Infective tubulointerstitial nephritis | 1 (3.6)  |
| Extracapillar crescentic glomerulonephritis | 0 (0)     | Kidney abscess                         | 3 (10.7) |
| Acute tubular necrosis                      | 22 (78.6) | Kidney infarction                      | 1 (3.6)  |
| Acute tubular necrosis (ischaemic)          | 11 (39.3) | Renal artery embolism                  | 1 (3.6)  |
| Acute tubular necrosis (toxic)              | 11 (39.3) | Shock kidney                           | 4 (14.3) |

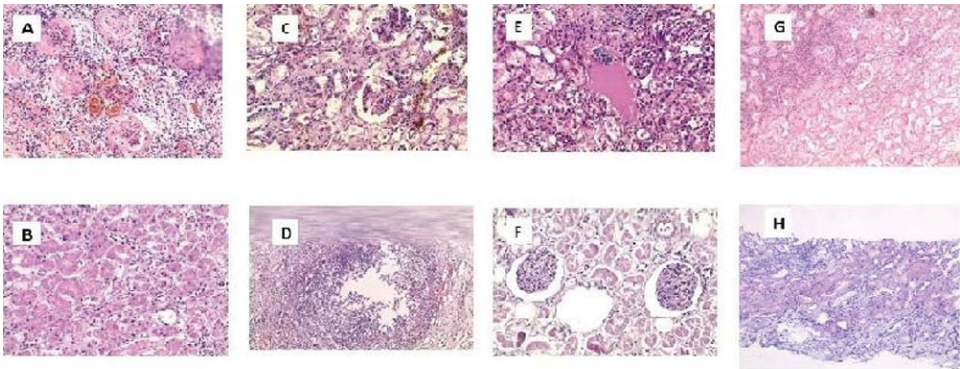

A) Diabetic glomerulosclerosis B) Acute tubular necrosis C) Emboli in the artery D) Kidney abscess E) Allergic tubulo-interstitial nephritis F) Mesangioproliferative glomerulonephritis G) Kidney infarction H) Acute tubular necrosis (intravital biopsy)
